# Supplementary material
Source: JCI journal article supplement (doi:10.1172/jci87058)

# Supplementary Figure 1

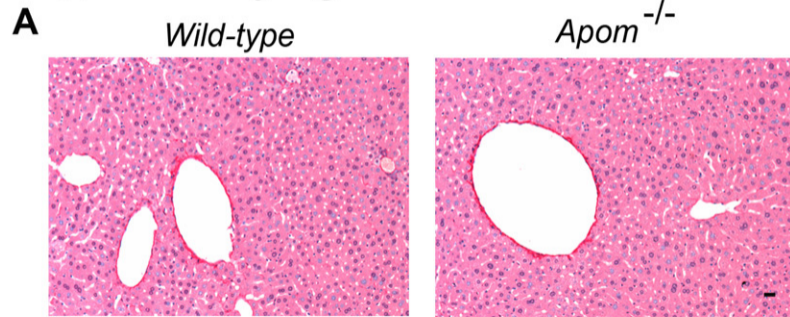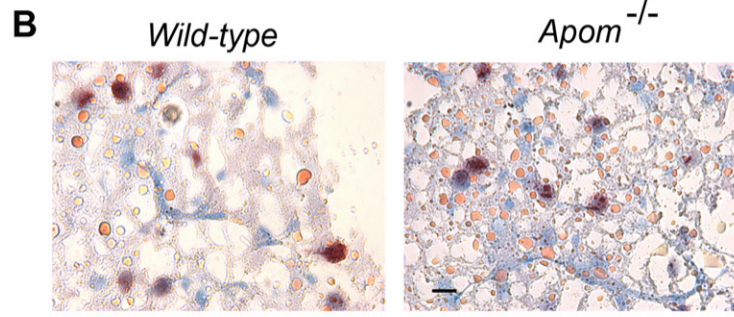

BrdU staining, PH Day 2

## Supplementary Figure 2

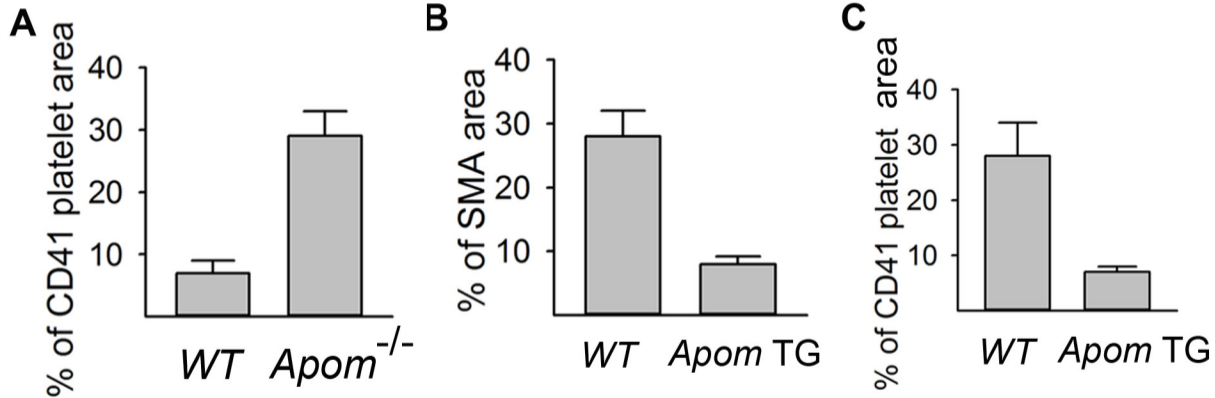

### Supplementary Figure 3

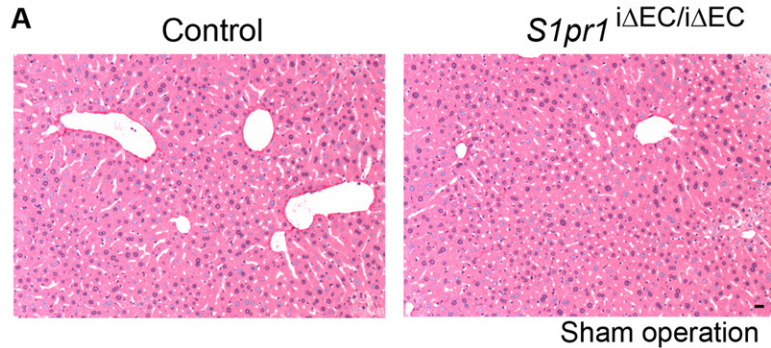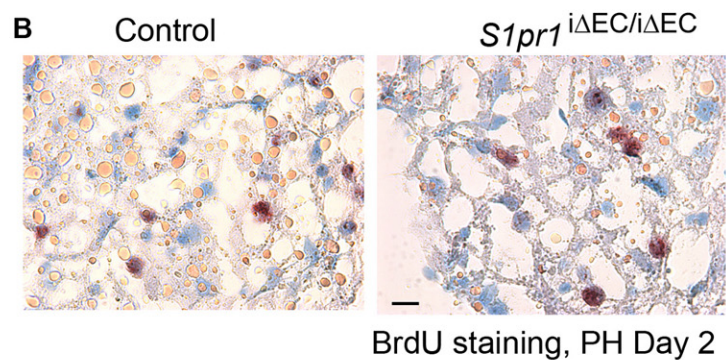

Supplement: sd1 [file 1]
